# Supplementary material
Source: publisher figshare collection journal article supplement (https://sage.figshare.com/ndownloader/files/13612337)
Supplement: Supplementary file 1 [file 13612337]

### Exercise 3. I Am Statements

**Instructions:** Think about your identity and, in the space below; complete the sentence “I am...” as many times as you can in Column A.

| Column A   | Column B |
|------------|----------|
| I am _____ | _____    |

After completing your statements, follow your instructor’s guidance to label them in Column B with an “I” (Individual/personal), “R” (Relational), or “C” (Collective/Social).

**Question Prompt:** How do these answers match up to your meaning and strength of leader identity?
